# Supplementary material for: Magnetic resonance imaging: an innovative approach to observe rare metal extraction using ionic liquid
Source: Royal Society of Chemistry journal article supplement (doi:10.1039/d4cp01593b), 2024-01-01
Supplement: d4cp01593b3.pdf [file d4cp01593b3.pdf]

## Supporting information

### **Magnetic resonance imaging: An innovative approach to observe rare metal extraction using ionic liquid**

*Arunkumar Dorai,<sup>\*a</sup> Mrutyunjay Panigrahi,<sup>a,b</sup> Nithya Hellar,<sup>a</sup> Yoshiki Iwai<sup>a,c</sup> and Junichi Kawamura<sup>a,\*</sup>*

- a. Institute of Multidisciplinary Research for Advanced Materials, Tohoku University, 2-1-1 Katahira, Aoba-ku, Sendai, 980-8577, Japan.
- b. School of Mechanical Engineering, Vellore Institute of Technology, Chennai-600127, India.
- c. Technology and Innovation Division, Panasonic Corporation, Osaka, Japan

E-mail: dorai.arunkumar.c7@tohoku.ac.jp; junichi.kawamura.a8@tohoku.ac.jp

**Table S1: Nomenclature of the prepared samples.**

| Nomenclature | Sample Description                      |
|--------------|-----------------------------------------|
| TTPB         | Ionic liquid                            |
| DIW          | Ionic liquid + water                    |
| Nd5          | Ionic liquid + 5 mg NdCl <sub>3</sub>   |
| Nd10         | Ionic liquid + 10 mg NdCl <sub>3</sub>  |
| Nd25         | Ionic liquid + 25 mg NdCl <sub>3</sub>  |
| Nd50         | Ionic liquid + 50 mg NdCl <sub>3</sub>  |
| Nd75         | Ionic liquid + 75 mg NdCl <sub>3</sub>  |
| Nd100        | Ionic liquid + 100 mg NdCl <sub>3</sub> |
| Nd300        | Ionic liquid + 300 mg NdCl <sub>3</sub> |
| Nd500        | Ionic liquid + 500 mg NdCl <sub>3</sub> |

**Table S2: <sup>1</sup>H NMR peak position for TTPB ionic liquid and Nd containing complexes.**

| Sample | Peak Position (ppm)    |                              |                           |                                |                         |                  |
|--------|------------------------|------------------------------|---------------------------|--------------------------------|-------------------------|------------------|
|        | <i>CH</i> <sub>3</sub> | <i>CH</i> <sub>(2-all)</sub> | <i>CH</i> <sub>2(1)</sub> | <i>H</i> <sub>2</sub> <i>O</i> | <i>Meta, Para (m,p)</i> | <i>Ortho (o)</i> |
| TTPB   | 0.97                   | 1.38                         | 2.57                      | 4.69                           | 7.19                    | 8.07             |
| DIW    | 0.94                   | 1.39                         | 2.25                      | 4.69                           | 7.27                    | 8.12             |
| Nd5    | 1.16                   | 1.61                         | 2.45                      | 4.89                           | 7.49                    | 8.35             |
| Nd10   | 1.26                   | 1.70                         | 2.55                      | 4.98                           | 7.59                    | 8.46             |
| Nd25   | 1.74                   | 2.18                         | 3.01                      | 5.40                           | 8.09                    | 8.99             |
| Nd50   | 2.50                   | 2.94                         | 3.74                      | 6.05                           | 8.88                    | 9.86             |
| Nd75   | 3.32                   | 3.76                         | 4.52                      | 6.76                           | 9.73                    | 10.76            |
| Nd100  | 4.06                   | 4.47                         | 5.18                      | 7.36                           | 10.48                   | 11.57            |
| Nd300  | 4.34                   | 4.75                         | 5.60                      | 7.36                           | 10.86                   | 12.06            |

**Table S3. T<sub>1</sub> relaxation time for the neodymium containing complexes.**

| Sample Code | T <sub>1</sub> relaxation time (s) |                        |                    |                  |            |       |
|-------------|------------------------------------|------------------------|--------------------|------------------|------------|-------|
|             | Cation                             |                        |                    | H <sub>2</sub> O | Anion      |       |
|             | t-CH <sub>3</sub>                  | CH <sub>2(2-all)</sub> | CH <sub>2(1)</sub> |                  | Meta, Para | Ortho |
| TTPB        | 0.47                               | 0.40                   | 0.38               | 0.32             | 0.5        | 0.48  |
| DIW         | 0.56                               | 0.39                   | 0.31               | 0.31             | 0.62       | 0.64  |
| Nd5         | 0.54                               | 0.38                   | 0.27               | 0.23             | 0.57       | 0.47  |
| Nd10        | 0.53                               | 0.38                   | 0.28               | 0.24             | 0.56       | 0.49  |
| Nd25        | 0.53                               | 0.38                   | 0.27               | 0.19             | 0.54       | 0.39  |
| Nd50        | 0.49                               | 0.36                   | 0.26               | 0.13             | 0.46       | 0.28  |
| Nd75        | 0.44                               | 0.34                   | 0.25               | 0.10             | 0.39       | 0.23  |
| Nd100       | 0.40                               | 0.32                   | 0.24               | 0.08             | 0.34       | 0.20  |
| Nd300       | 0.41                               | 0.33                   | 0.23               | 0.06             | 0.28       |       |

**Table S4. T<sub>2</sub> relaxation time for the neodymium containing complexes.**

| Sample Code | T <sub>2</sub> relaxation time (ms) |                         |                     |                  |            |        |
|-------------|-------------------------------------|-------------------------|---------------------|------------------|------------|--------|
|             | Cation                              |                         |                     | H <sub>2</sub> O | Anion      |        |
|             | t-CH <sub>3</sub>                   | CH <sub>2</sub> (2-all) | CH <sub>2</sub> (1) |                  | Meta, Para | Ortho  |
| TTPB        | 37.82                               | 22.57                   | 5.16                | -                | 25.00      | 20.35  |
| DIW         | 119.50                              | 73.60                   | 32.14               | 169.83           | 134.60     | 130.00 |
| Nd5         | 71.81                               | 47.65                   | 18.43               | 22.02            | 50.30      | 25.40  |
| Nd10        | 47.36                               | 34.07                   | 16.99               | 27.32            | 44.04      | 30.63  |
| Nd25        | 51.75                               | 35.29                   | 12.25               | 15.92            | 32.30      | 13.68  |
| Nd50        | 37.25                               | 25.41                   | 6.60                | 7.80             | 19.54      | 6.14   |
| Nd75        | 28.18                               | 20.19                   | 4.12                | 5.44             | 13.94      | 3.45   |
| Nd100       | 16.85                               | 12.64                   | 3.11                | 3.68             | 8.84       | 2.43   |
| Nd300       | 22.45                               | 16.32                   | 3.37                | 3.37             | 5.56       | 1.71   |

**Table S5: TR dependence of MRI signal intensity at different Nd concentrations with fixed TE of 5.7ms**

|         | Repetition Time (TR)                                                                |                                                                                     |                                                                                     |                                                                                     |                                                                                       |                                                                                       |
|---------|-------------------------------------------------------------------------------------|-------------------------------------------------------------------------------------|-------------------------------------------------------------------------------------|-------------------------------------------------------------------------------------|---------------------------------------------------------------------------------------|---------------------------------------------------------------------------------------|
|         | 300 ms                                                                              | 500 ms                                                                              | 1000 ms                                                                             | 1500 ms                                                                             | 5000 ms                                                                               | 50000 ms                                                                              |
| Nd 10mg |  |  |  |  |  |  |
| Nd 25mg |  |  |  |  |  |  |
| Nd 75mg |  |  |  |  |  |  |

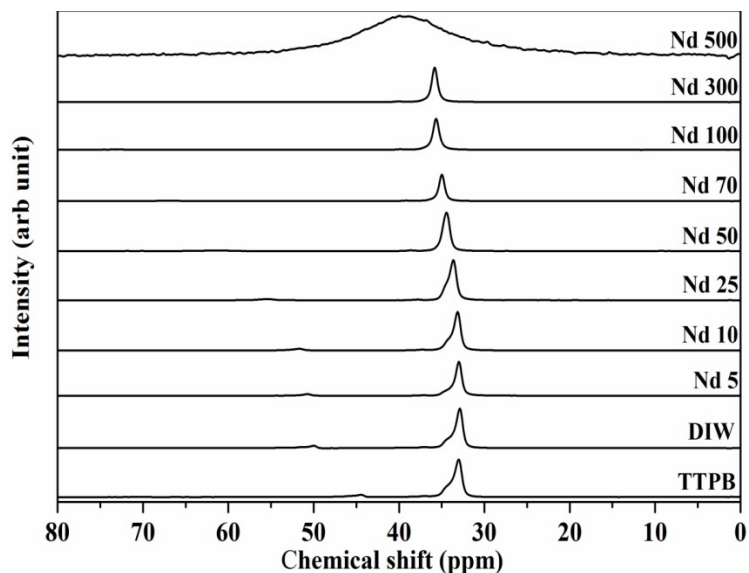

**Figure S1.  $^{31}\text{P}$  NMR spectra of neodymium containing complexes.**

$^{31}\text{P}$  NMR spectra for the neodymium containing ionic liquid complexes are shown in Fig. S1. A small amount of phosphonium impurities were observed in the samples along with the TTP cation as reported earlier<sup>35</sup>. The peaks are shifted down field similar to the  $^1\text{H}$  NMR signals due to the very strong dipolar interaction exerted by neodymium ion on the cation.

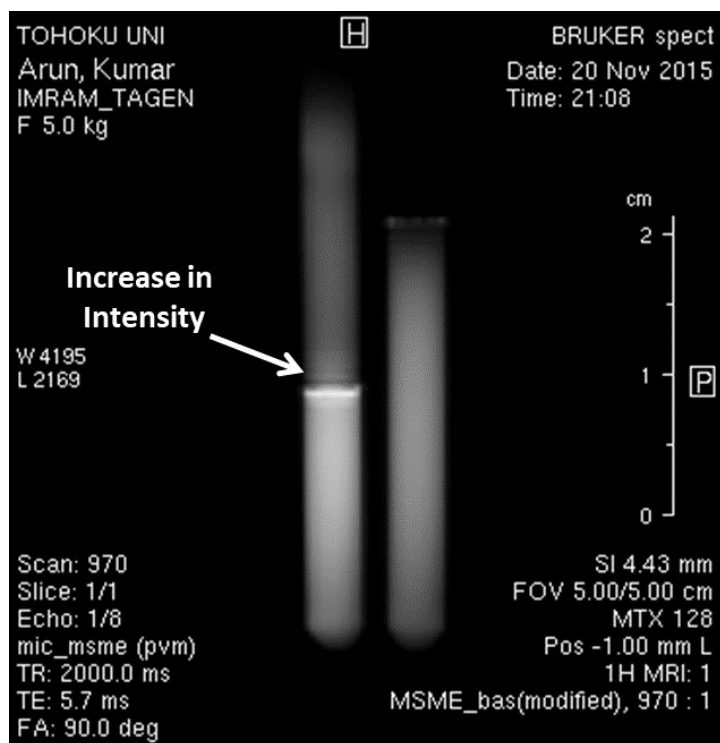

**Fig. S2.  $^1\text{H}$  MRI acquired after  $\sim 10\text{h}$  of 10mg Nd extraction using TTPB IL**

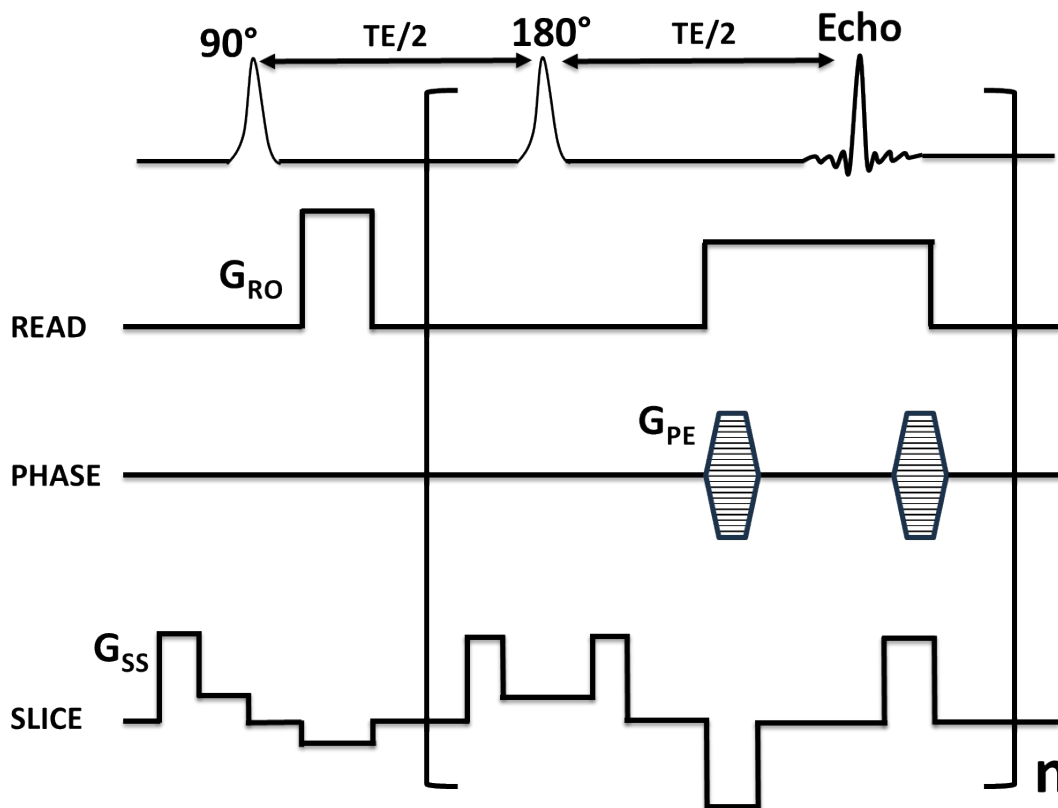

Fig. S3. Pulse scheme for the MSME imaging pulse sequence used in this study.  $G_{RO}$ ,  $G_{PE}$  and  $G_{SS}$  are the magnitudes of the read-out, phase-encoding and slice-selective gradients respectively. TE is the echo time and n is the number of echoes.

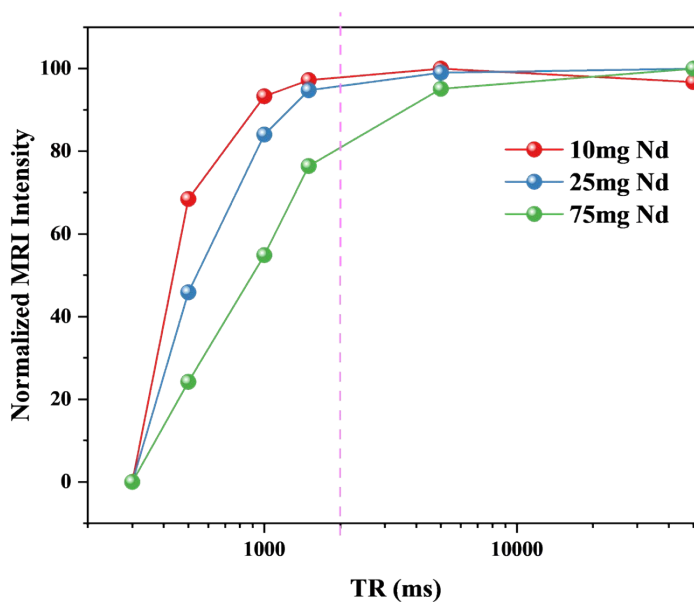

Fig. S4. TR dependence of MRI signal intensity
